# Supplementary material
Source: PubMed Central journal article supplement (PMC1458865)

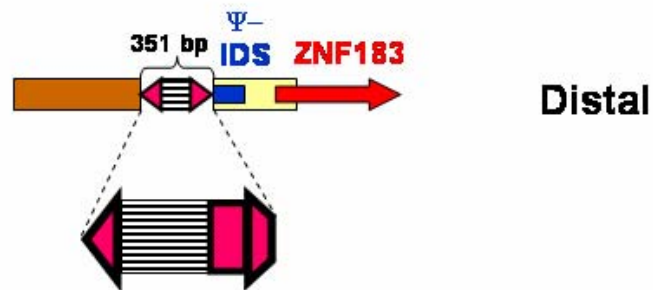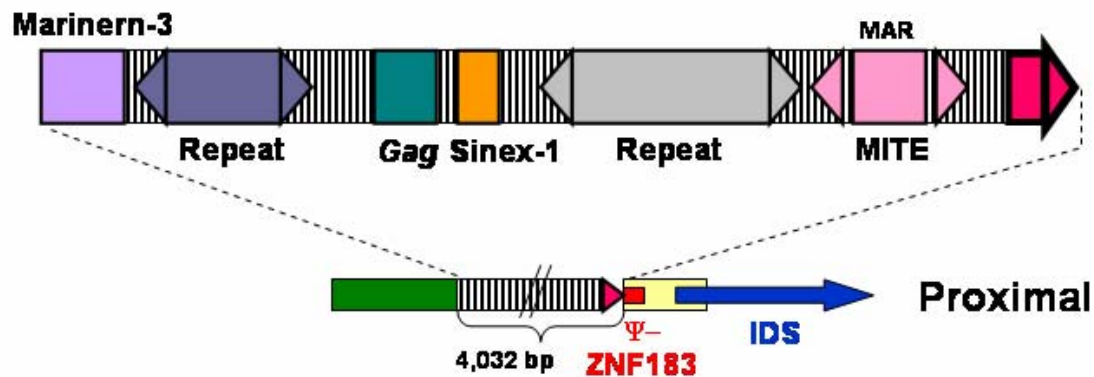

Supplement: pnas_0509683103_1.pdf [file pnas_0509683103_1.pdf]

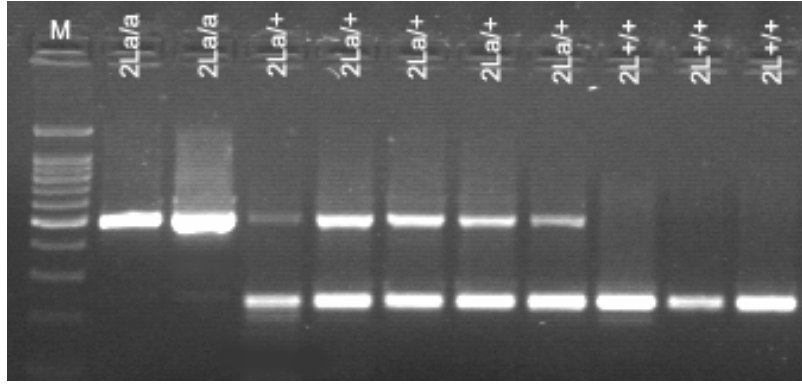

Supplement: pnas_0509683103_2.pdf [file pnas_0509683103_2.pdf]
